# Supplementary material
Source: PubMed Central journal article supplement (PMC2148264)

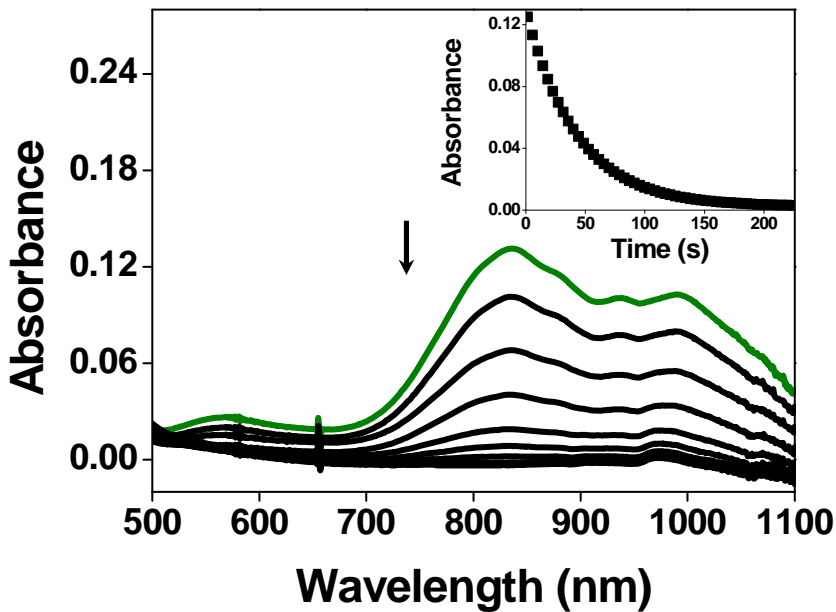

Supplement: pnas_0709471104_1.pdf [file pnas_0709471104_1.pdf]

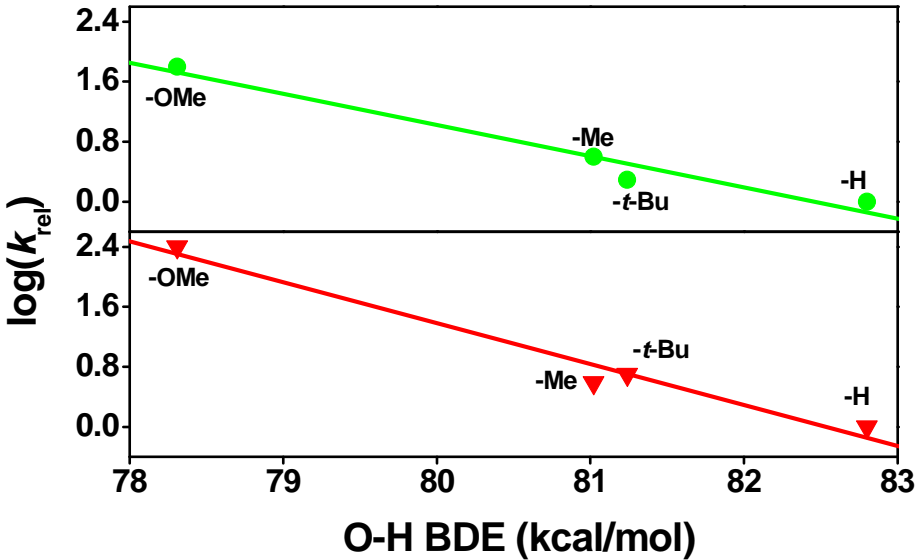

Supplement: pnas_0709471104_3.pdf [file pnas_0709471104_3.pdf]
